# Supplementary material for: Transformation details of poly(acrylonitrile) to poly(amidoxime) during the amidoximation process
Source: Royal Society of Chemistry journal article supplement (doi:10.1039/d0ra09096d), 2021-01-01
Supplement: d0ra09096d1.pdf [file d0ra09096d1.pdf]

1 **Table SI-1. Curve fitting results of XPS N 1s spectra.**

|           | Peak                     | BE <sup>a</sup> (eV) | FWHM <sup>b</sup> (eV) | at. % |
|-----------|--------------------------|----------------------|------------------------|-------|
| PAN       | -C≡N                     | 398.72               | 1.52                   | 74.3  |
|           | N-H                      | 399.30               | 2.42                   | 25.7  |
| PAO, 1 h  | -C≡N                     | 398.80               | 1.70                   | 32.0  |
|           | N-H                      | 399.30               | 1.30                   | 60.8  |
|           | -C(NH <sub>2</sub> )=NOH | 400.40               | 1.32                   | 7.20  |
| PAO, 2 h  | -C≡N                     | 398.78               | 2.12                   | 26.7  |
|           | N-H                      | 399.33               | 1.26                   | 62.7  |
|           | -C(NH <sub>2</sub> )=NOH | 400.40               | 1.83                   | 10.5  |
| PAO, 3 h  | -C≡N                     | 398.75               | 1.79                   | 28.0  |
|           | N-H                      | 399.30               | 1.26                   | 58.0  |
|           | -C(NH <sub>2</sub> )=NOH | 400.54               | 1.54                   | 14.0  |
| PAO, 4 h  | -C≡N                     | 398.80               | 1.94                   | 24.6  |
|           | N-H                      | 399.30               | 1.28                   | 59.9  |
|           | -C(NH <sub>2</sub> )=NOH | 400.40               | 1.66                   | 15.6  |
| PAO, 6 h  | -C≡N                     | 398.60               | 1.86                   | 20.2  |
|           | N-H                      | 399.30               | 1.28                   | 65.8  |
|           | -C(NH <sub>2</sub> )=NOH | 400.40               | 1.80                   | 14.0  |
| PAO, 12 h | -C≡N                     | 398.60               | 1.81                   | 20.0  |
|           | N-H                      | 399.37               | 1.23                   | 65.6  |
|           | -C(NH <sub>2</sub> )=NOH | 400.41               | 1.49                   | 14.4  |
| PAO, 24 h | -C≡N                     | 398.80               | 1.83                   | 19.3  |
|           | N-H                      | 399.30               | 1.27                   | 70.0  |
|           | -C(NH <sub>2</sub> )=NOH | 400.45               | 1.82                   | 10.8  |

2 <sup>a</sup>: Binding energy, <sup>b</sup>: Full width at half-maximum.

1 Table SI-2. Curve fitting results of XPS C 1s spectra.

|           | Peak                           | BE (eV) | FWHM (eV) | at. % |
|-----------|--------------------------------|---------|-----------|-------|
| PAN       | -C≡N                           | 284.66  | 1.49      | 66.2  |
|           | C-C                            | 285.20  | 1.43      | 13.2  |
|           | C-OH                           | 286.42  | 1.28      | 13.5  |
|           | C=O                            | 287.47  | 1.69      | 6.39  |
|           | -COO <sup>-</sup>              | 288.70  | 1.10      | 0.77  |
| PAO, 1 h  | -C≡N                           | 284.66  | 1.54      | 59.7  |
|           | C-C                            | 285.22  | 1.41      | 11.2  |
|           | C-OH, -C(NH <sub>2</sub> )=NOH | 286.42  | 1.15      | 21.2  |
|           | C=O                            | 287.50  | 1.83      | 6.61  |
|           | -COO <sup>-</sup>              | 288.70  | 1.18      | 1.40  |
| PAO, 2 h  | -C≡N                           | 284.62  | 1.39      | 57.5  |
|           | C-C                            | 285.39  | 1.57      | 13.2  |
|           | C-OH, -C(NH <sub>2</sub> )=NOH | 286.34  | 1.08      | 16.1  |
|           | C=O                            | 287.50  | 2.00      | 10.9  |
|           | -COO <sup>-</sup>              | 288.70  | 0.97      | 2.39  |
| PAO, 3 h  | -C≡N                           | 284.60  | 1.38      | 64.3  |
|           | C-C                            | 285.40  | 1.55      | 10.7  |
|           | C-OH, -C(NH <sub>2</sub> )=NOH | 286.30  | 1.15      | 12.3  |
|           | C=O                            | 287.50  | 2.07      | 10.4  |
|           | -COO <sup>-</sup>              | 288.70  | 1.09      | 2.18  |
| PAO, 4 h  | -C≡N                           | 284.61  | 1.19      | 52.2  |
|           | C-C                            | 285.20  | 2.34      | 29.8  |
|           | C-OH, -C(NH <sub>2</sub> )=NOH | 286.35  | 0.98      | 7.69  |
|           | C=O                            | 287.50  | 1.98      | 6.35  |
|           | -COO <sup>-</sup>              | 288.60  | 0.89      | 3.96  |
| PAO, 6 h  | -C≡N                           | 284.60  | 1.26      | 55.2  |
|           | C-C                            | 285.20  | 2.57      | 26.7  |
|           | C-OH, -C(NH <sub>2</sub> )=NOH | 286.30  | 1.10      | 9.78  |
|           | C=O                            | 287.50  | 1.80      | 6.71  |
|           | -COO <sup>-</sup>              | 288.60  | 0.93      | 1.54  |
| PAO, 12 h | -C≡N                           | 284.60  | 1.27      | 57.3  |
|           | C-C                            | 285.20  | 2.56      | 24.0  |
|           | C-OH, -C(NH <sub>2</sub> )=NOH | 286.30  | 1.01      | 7.58  |
|           | C=O                            | 287.50  | 1.26      | 2.22  |
|           | -COO <sup>-</sup>              | 288.60  | 1.07      | 8.95  |
| PAO, 24 h | -C≡N                           | 284.64  | 1.24      | 54.2  |
|           | C-C                            | 285.20  | 2.41      | 26.9  |
|           | C-OH, -C(NH <sub>2</sub> )=NOH | 286.35  | 1.05      | 9.59  |
|           | C=O                            | 287.30  | 1.72      | 7.01  |
|           | -COO <sup>-</sup>              | 288.50  | 1.19      | 2.23  |

1 **Table SI-3. Curve fitting results of XPS O 1s spectra.**

|           | Peak                          | Position (eV) | FWHM (eV) | at. % |
|-----------|-------------------------------|---------------|-----------|-------|
| PAN       | -COO <sup>-</sup>             | 531.20        | 1.93      | 36.8  |
|           | C=O                           | 532.40        | 1.54      | 45.0  |
|           | -OH                           | 533.40        | 1.82      | 18.1  |
| PAO, 1 h  | -COO <sup>-</sup>             | 531.26        | 2.03      | 43.6  |
|           | C=O, -C(NH <sub>2</sub> )=NOH | 532.30        | 1.61      | 49.4  |
|           | -OH                           | 533.40        | 1.55      | 7.00  |
| PAO, 2 h  | -COO <sup>-</sup>             | 531.30        | 1.95      | 44.3  |
|           | C=O, -C(NH <sub>2</sub> )=NOH | 532.30        | 1.93      | 49.5  |
|           | -OH                           | 533.40        | 1.09      | 6.21  |
| PAO, 3 h  | -COO <sup>-</sup>             | 531.22        | 2.06      | 44.1  |
|           | C=O, -C(NH <sub>2</sub> )=NOH | 532.31        | 1.78      | 47.7  |
|           | -OH                           | 533.40        | 1.28      | 8.17  |
| PAO, 4 h  | -COO <sup>-</sup>             | 531.30        | 1.98      | 44.5  |
|           | C=O, -C(NH <sub>2</sub> )=NOH | 532.30        | 1.82      | 50.3  |
|           | -OH                           | 533.47        | 1.03      | 5.20  |
| PAO, 6 h  | -COO <sup>-</sup>             | 531.21        | 2.17      | 60.2  |
|           | C=O, -C(NH <sub>2</sub> )=NOH | 532.35        | 1.63      | 35.6  |
|           | -OH                           | 533.40        | 1.46      | 4.21  |
| PAO, 12 h | -COO <sup>-</sup>             | 531.30        | 1.54      | 34.4  |
|           | C=O, -C(NH <sub>2</sub> )=NOH | 532.30        | 1.94      | 60.0  |
|           | -OH                           | 533.40        | 1.01      | 5.55  |
| PAO, 24 h | -COO <sup>-</sup>             | 531.20        | 2.04      | 55.0  |
|           | C=O, -C(NH <sub>2</sub> )=NOH | 532.35        | 1.56      | 38.4  |
|           | -OH                           | 533.40        | 1.49      | 6.65  |

2 **Table SI-4. Parameters calculated from Langmuir and Freundlich models for U(VI)**

3 adsorption on PAO prepared at different amidoximation times.

|           | Langmuir model            |          |                | Freundlich model |       |                |
|-----------|---------------------------|----------|----------------|------------------|-------|----------------|
|           | C <sub>s,max</sub> (mg/g) | b (L/mg) | R <sup>2</sup> | K (mg/g)         | 1/n   | R <sup>2</sup> |
| PAO, 1 h  | 60.0                      | 0.103    | 0.984          | 14.8             | 0.302 | 0.882          |
| PAO, 2 h  | 69.0                      | 0.220    | 0.991          | 25.6             | 0.227 | 0.899          |
| PAO, 3 h  | 91.2                      | 0.880    | 0.989          | 49.2             | 0.155 | 0.837          |
| PAO, 4 h  | 81.2                      | 0.624    | 0.996          | 41.3             | 0.166 | 0.856          |
| PAO, 6 h  | 74.2                      | 0.514    | 0.993          | 37.0             | 0.168 | 0.832          |
| PAO, 12 h | 71.4                      | 0.258    | 0.991          | 28.2             | 0.215 | 0.889          |
| PAO, 24 h | 64.4                      | 0.122    | 0.985          | 17.7             | 0.283 | 0.875          |

4
